# Supplementary material for: Intermittent Rivers as a Challenge for Freshwater Ecosystems Quality Evaluation: A Study Case in the Ribeira de Silveirinhos, Portugal
Source: MDPI journal article supplement (doi:10.3390/w15010017), 2022-12-21
Supplement: s1 [file s1]

Archive with 1 entries (1 files):
- water-2067346-supplementary.pdf
