# Supplementary material for: Intermittent Rivers as a Challenge for Freshwater Ecosystems Quality Evaluation: A Study Case in the Ribeira de Silveirinhos, Portugal
Source: MDPI journal article supplement (doi:10.3390/w15010017), 2022-12-21
Supplement: s1 [file s1 › water-2067346-supplementary.pdf]

*Article*

# **Intermittent Rivers as a Challenge for Freshwater Ecosystems Quality Evaluation: A Study Case in the Ribeira de Silveirinhos, Portugal**

**Sara Rodrigues <sup>1,2,\*</sup>, Bárbara Xavier <sup>1</sup>, Sandra Nogueira <sup>1</sup> and Sara C. Antunes <sup>1,2,\*</sup>**

<sup>1</sup> Departamento de Biologia, Faculdade de Ciências, Universidade do Porto, 4169-007 Porto, Portugal

<sup>2</sup> Centro Interdisciplinar de Investigação Marinha e Ambiental (CIIMAR/CIMAR), Terminal de Cruzeiros do Porto de Leixões, Avenida General Norton de Matos S/N, 4450-208 Matosinhos, Portugal

\* Correspondence: sara.rodrigues@fc.up.pt (S.R.); scantunes@fc.up.pt (S.C.A.)

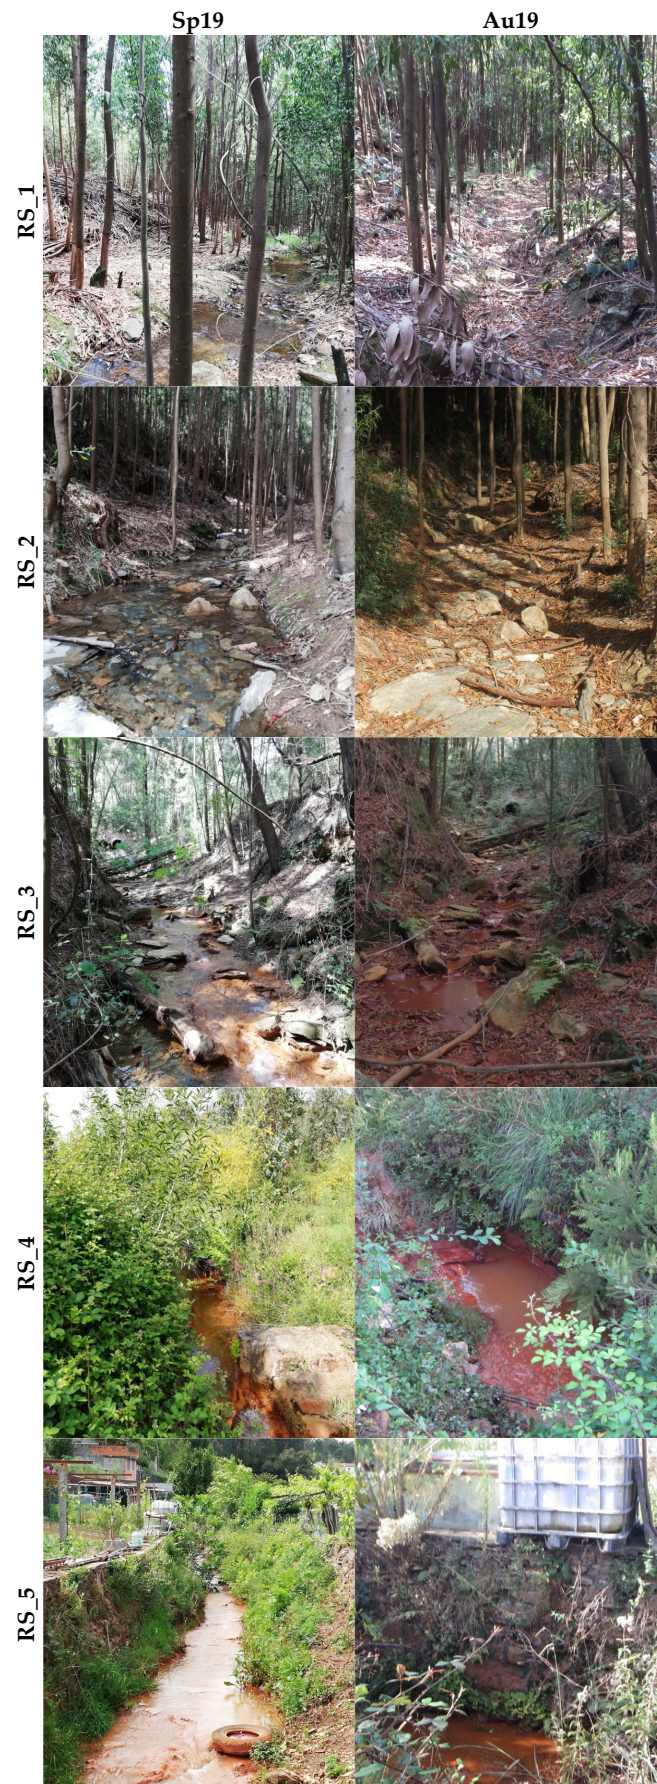

**Figure S1** - Sampling sites of Ribeira de Silveirinhos in Parque das Serras do Porto (PSeP), Portugal in the spring (Sp19) and autumn of 2019 (Au19). RS\_1 merged by the monoculture of Eucalyptus in Sp19, and Au19 with no water flow. RS\_2 merged by the monoculture of eucalyptus in Sp19 and Au19 with no water flow. RS\_3 in Sp19 and in Au19 with the existence of small pools of flow. RS\_4 in Sp19 and Au19 shows a

brownish-yellow hue. RS\_5 in Sp19 and Au19, with the presence of subsistence agriculture, high artificialization of margins, and pollution.

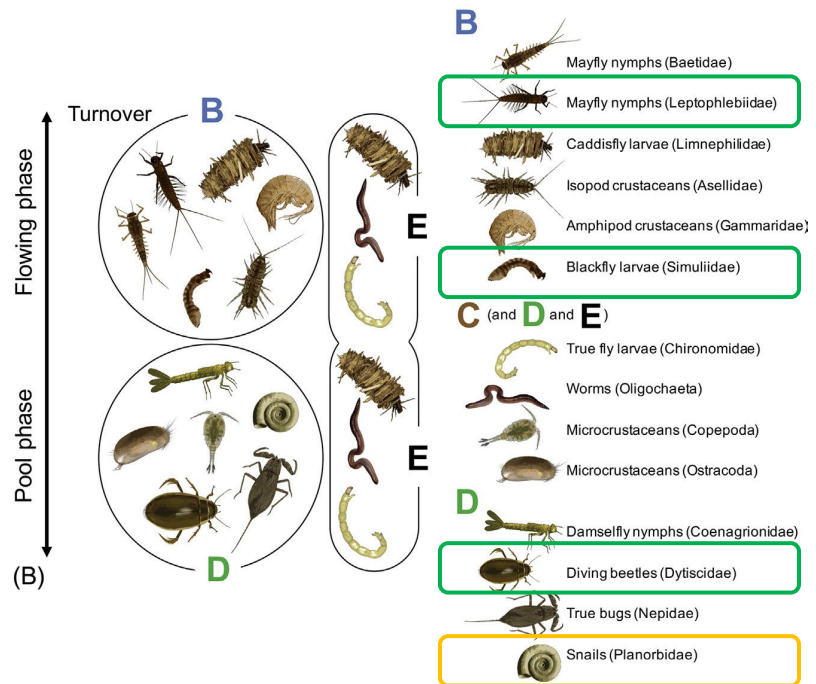

**Figure S2** - Macroinvertebrate communities exhibit turnover as transition conditions between the flow (B) and pool (D) phases. Group E represents generalist bodies that adapt to the various conditions (adapted from Stubbington et al. 2017). Green indicates families found in wet period sampling (Sp19 and Sp20) and orange in the dry period (Au19) in the present study.
